# Supplementary material
Source: PubMed Central journal article supplement (PMC6926160)

Supplemental Data:

*There were no statistically significant or clinically important differences in MEDFACTS and IPAQ at baseline between Ustekinumab and placebo groups:*

| measure                               | n  | coef    | p      | 95% CI  |         |
|---------------------------------------|----|---------|--------|---------|---------|
| Difference in<br>baseline IPAQ<br>MET | 39 | 1619.80 | 0.2051 | -924.77 | 4164.37 |
| Difference in<br>baseline<br>MEDFACTS | 43 | -0.39   | 0.9626 | -17.26  | 16.47   |

**Supplemental Table 1. Non-Serious Adverse Events During Trial Period**

| Adverse Event                           | Ustekinumab | Placebo   | Total    |
|-----------------------------------------|-------------|-----------|----------|
| Common Cold                             | 3 (13.64)   | 0         | 3 (6.98) |
| External Ear Pain*                      | 0           | 1 (4.76)  | 1 (2.33) |
| Fracture*                               | 1 (4.55)    | 0         | 1 (2.33) |
| Pain                                    | 0           | 1 (4.76)  | 1 (2.33) |
| Skin and Subcutaneous Tissue Disorders* | 1 (4.55)    | 0         | 1 (2.33) |
| Upper Respiratory Infection             | 1 (4.55)    | 3 (14.29) | 4 (9.30) |
| Urinary Tract Infection*                | 1 (4.55)    | 0         | 1 (2.33) |

\* Total adverse events greater than 5 percent throughout the trial

**Supplemental Table 2. Non-Serious Adverse Events During Open Label Extension period**

| Adverse Event                                | Ustekinumab | Placebo cross over to<br>Ustekinumab | Total      |
|----------------------------------------------|-------------|--------------------------------------|------------|
| Allergies to Foods,<br>Food Additives, Drugs | 0           | 2 (9.52)                             | 2 (4.65)   |
| Anxiety                                      | 2 (9.09)    | 0                                    | 2 (4.65)   |
| Back Pain                                    | 2 (9.09)    | 9                                    | 2 (4.65)   |
| Common Cold                                  | 3 (13.64)   | 2 (9.52)                             | 5 (11.63)  |
| Dizziness                                    | 2 (9.09)    | 0                                    | 2 (4.65)   |
| External Ear Pain*                           | 0           | 1 (4.76)                             | 1 (2.33)   |
| Fracture*                                    | 1 (4.55)    | 0                                    | 1 (2.33)   |
| Pain*                                        | 0           | 1 (4.76)                             | 1 (2.33)   |
| Skin and<br>Subcutaneous Tissue<br>Disorders | 1 (4.55)    | 1 (4.76)                             | 2 (4.65)   |
| Upper Respiratory<br>Infection               | 10 (45.45)  | 4 (19.05)                            | 14 (32.56) |
| Urinary Tract<br>Infection                   | 2 (9.09)    | 0                                    | 2 (4.65)   |

\* Total adverse events greater than 5 percent throughout the trial

**Supplemental Figure 1: Study Schematic**

**Supplemental Figure 2. Patient recruitment scheme for the study.**

Supplemental Figure 1: Study Schematic

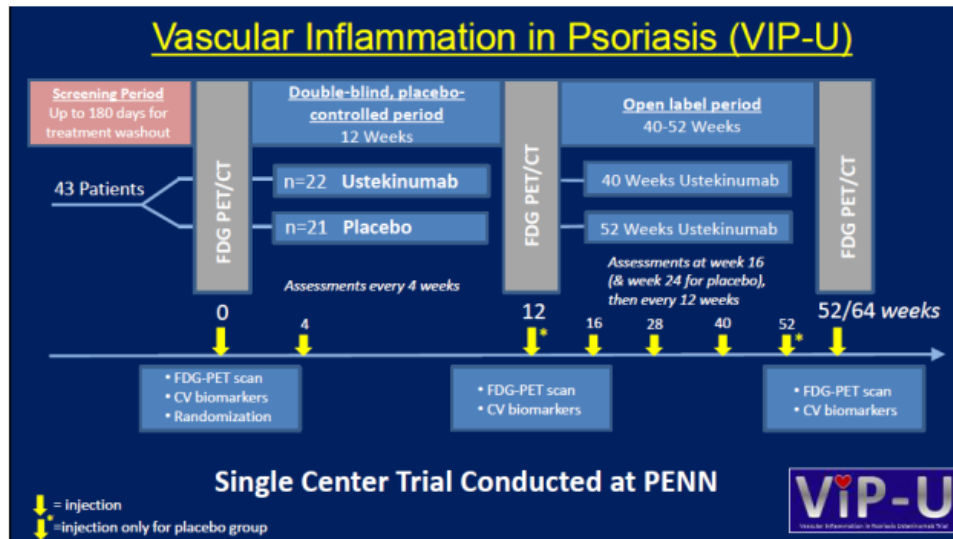

**Supplemental Figure 2. Patient recruitment scheme for the study.**

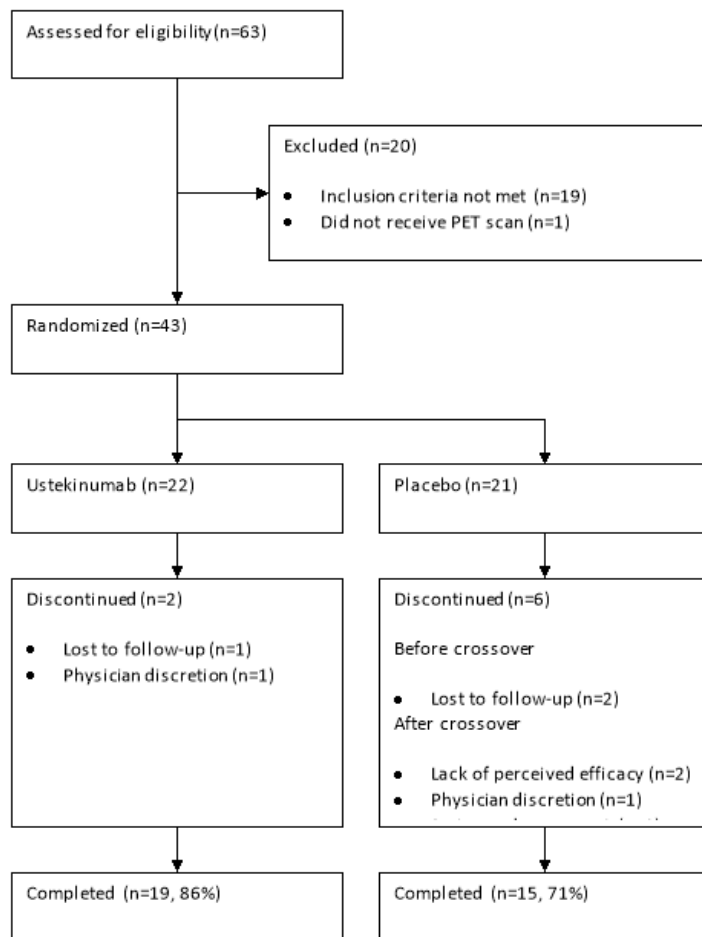

Supplement: NIHMS1535110-supplement-1.pdf [file NIHMS1535110-supplement-1.pdf]
